# Supplementary material
Source: Research Square preprint supplement (doi:10.21203/rs.3.rs-9592946/v1)
Supplement: Supplementary file 1 [file 2edc76843d879e68b6e55d56.docx]

**Supplementary Material**

**List of Supplementary Tables**

**Table S1.** ANOVA for shoot and root growth and physiological traits of canola (rapeseed) …………………… Page 1

**Table S2.** ANOVA for canola (rapeseed) shoot and root phosphorus and zinc concentration …………………Page 2

**Table S3.** ANOVA for canola (rapeseed) shoot and root phosphorus and zinc uptake ……………………… Page 2

**Supplementary Table S1.** Analysis of variance (ANOVA) for the main and interaction effects of soil-applied TSP, foliar application, and fertigation of phosphoric acid on shoot and root growth characteristics and Chlorophyll index in canola.

| Source of variation | df | Shoot dry weight | Stem diameter | Leaf area | Chlorophyll index | Root dry weight | Root length | Root volume |
| --- | --- | --- | --- | --- | --- | --- | --- | --- |
| Soil-applied TSP | 3 | 463** | 47.9** | 9,810,657** | 148** | 6.58** | 103* | 882** |
| Foliar phosphoric acid | 1 | 17.4** | 0.89** | 6.75 ns | 70.4** | 0.08 ns | 0.005 ns | 89.3** |
| Phosphoric acid fertigation | 1 | 4.61* | 8.55** | 582,120** | 0.20 ns | 0.29 ns | 30.8** | 47.0** |
| TSP × Foliar | 3 | 7.19** | 0.87** | 21,789 ns | 10.7 ns | 0.28 ns | 24.5** | 52.3** |
| TSP × Fertigation | 3 | 3.48* | 1.13** | 133,033** | 5.58 ns | 0.50* | 6.90* | 146** |
| Foliar × Fertigation | 1 | 2.41ns | 0.12 ns | 216 ns | 4.23 ns | 0.32 ns | 0.88 ns | 27.7** |
| TSP × Foliar × Fertigation | 3 | 0.43ns | 0.30 ns | 8,378 ns | 7.52 ns | 0.47* | 5.90* | 48.3** |
| Error | 32 | 0.90 | 0.11 | 13,573 | 3.84 | 0.11 | 1.79 | 3.88 |
| Coefficient of variation (%) | – | 8.46 | 4.06 | 5.36 | 3.99 | 12.26 | 4.73 | 5.05 |

**Note:** * and ** indicate significance at the 5% and 1% levels, respectively; ns: not significant.

**TSP:** triple superphosphate; **Foliar:** foliar application of phosphoric acid (H₃PO₄); **Fertigation:** soil fertigation with phosphoric acid (H₃PO₄).

**Supplementary Table S2.** Analysis of variance (ANOVA) for the main effects of soil-applied TSP, foliar and fertigation of phosphoric acid, and their interactions on phosphorus and zinc concentration in shoot and root tissues of canola.

| Source of Variation | df | Shoot P Conc. | Shoot Zn Conc. | Root P Conc. | Root Zn Conc. |
| --- | --- | --- | --- | --- | --- |
| Soil-applied TSP | 3 | 0.146** | 1431** | 0.205** | 177113** |
| Foliar application of phosphoric acid | 1 | 0.016** | 60.7** | 0.002** | 14508** |
| Fertigation of phosphoric acid | 1 | 0.007** | 52.0** | 0.015** | 976ns |
| TSP × Foliar | 3 | 0.0001ns | 18.6** | 0.001** | 20917** |
| TSP × Fertigation | 3 | 0.001ns | 16.2** | 0.0002ns | 55343** |
| Foliar × Fertigation | 1 | 0.001ns | 2.08ns | 0.0007ns | 10428** |
| TSP × Foliar × Fertigation | 3 | 0.0006ns | 4.09ns | 0.0002ns | 15056** |
| Error | 32 | 0.0004 | 3.45 | 0.0002 | 518 |
| Coefficient of Variation (%) | – | 7.85 | 6.61 | 7.48 | 10.6 |

**Note:** * and ** indicate significance at the 5% and 1% levels, respectively; ns: not significant; **P:** phosphorus; **Zn:** zinc.

**TSP:** triple superphosphate; **Foliar:** foliar application of phosphoric acid (H₃PO₄); **Fertigation:** soil fertigation with phosphoric acid (H₃PO₄).

**Supplementary Table S3.** Analysis of variance (ANOVA) for the main effects of soil-applied TSP, foliar and fertigation of phosphoric acid, and their interactions on phosphorus and zinc uptake in shoot and root tissues of canola.

| Source of variation | df | Shoot P uptake | Shoot Zn uptake | Root P uptake | Root Zn uptake |
| --- | --- | --- | --- | --- | --- |
| Soil-applied TSP | 3 | 9333** | 116458** | 318** | 1655057** |
| Foliar application of phosphoric acid | 1 | 637** | 1638* | 7.72** | 161008** |
| Fertigation of phosphoric acid | 1 | 227** | 1184 ns | 5.94** | 39790 ns |
| TSP × Foliar | 3 | 113** | 513 ns | 10.1 ns | 157231** |
| TSP × Fertigation | 3 | 2.06 ns | 5059** | 1.02 ns | 256647** |
| Foliar × Fertigation | 1 | 0.05 ns | 1906* | 1.51 ns | 8480 ns |
| TSP × Foliar × Fertigation | 3 | 9.89 ns | 414 ns | 0.92 ns | 46899* |
| Error | 32 | 5.87 | 379 | 0.73 | 15890 |
| Coefficient of variation (%) | – | 7.38 | 7.33 | 12.55 | 21.4 |

**Note:** * and ** indicate significance at the 5% and 1% levels, respectively; ns: not significant; **P**: phosphorus; **Zn**: zinc.

**TSP:** triple superphosphate; **Foliar:** foliar application of phosphoric acid (H₃PO₄); **Fertigation:** soil fertigation with phosphoric acid (H₃PO₄).
